# Supplementary material
Source: PubMed Central journal article supplement (PMC4167873)
Supplement: NIHMS626534-supplement-Supplemental_Material.pdf [file NIHMS626534-supplement-Supplemental_Material.pdf]

## Supplementary Online Content

Thilen SR, Treggiari MM, Lange JM, Lowy E, Weaver EM, Wijeyesundera DN. Preoperative consultations for medicare patients undergoing cataract surgery. *JAMA Intern Med*. Published online December 23, 2013. doi:10.1001/jamainternmed.2013.13426

**eTable 1.** Characteristics of the Entire 1995 to 2006 Cohort

**eTable 2.** Association of Consultation With Patient-, Provider-, Facility-, and Geographic-Level Characteristics—Sensitivity Analysis Based on Multiple Imputation

**eFigure.** Consultant Specialty by Year, as Percent of All Consultations in Each Year

This supplementary material has been provided by the authors to give readers additional information about their work.

**eTable 1. Characteristics of the entire 1995 to 2006 cohort<sup>a</sup>**

|                                               | Consultation<br>N=76,762 | No consultation<br>N=479,875 | Absolute Standardized Difference,<br>% | P value |
|-----------------------------------------------|--------------------------|------------------------------|----------------------------------------|---------|
| <b>Demographics</b>                           |                          |                              |                                        |         |
| Age, mean (SD)                                | 77.0 (6.2)               | 76.6 (6.2)                   | 6.7                                    | <0.001  |
| Age, 10-year categories                       |                          |                              |                                        |         |
| 66-74                                         | 28,442 (37.1)            | 193,540 (40.3)               | 6.7                                    |         |
| 75-84                                         | 38,976 (50.8)            | 231,600 (48.3)               | 5.0                                    | <0.001  |
| ≥85                                           | 9344 (12.2)              | 54,735 (11.4)                | 2.4                                    |         |
| Female                                        | 49,175 (64.1)            | 305,549 (63.7)               | 0.8                                    | 0.04    |
| African-American                              | 3406 (4.4)               | 28,711 (6.0)                 | 7.0                                    | <0.001  |
| <b>Rural-Urban Status</b>                     |                          |                              |                                        |         |
| Isolated rural town                           | 3302 (4.3)               | 33,993 (7.1)                 | 12.0                                   |         |
| Small rural town                              | 3764 (4.9)               | 41,738 (8.7)                 | 15.1                                   | <0.001  |
| Large rural city                              | 7728 (10.1)              | 66,921 (13.9)                | 12.0                                   |         |
| Urban                                         | 58,910 (76.7)            | 333,391 (69.5)               | 16.4                                   |         |
| Unknown                                       | 3058 (4.0)               | 3832 (0.8)                   | 21.0                                   |         |
| <b>Comorbid Disease</b>                       |                          |                              |                                        |         |
| Ischemic heart disease                        | 22,158 (28.9)            | 124,544 (26.0)               | 6.5                                    | <0.001  |
| Cerebrovascular disease                       | 8537 (11.1)              | 47,761 (10.0)                | 3.8                                    | <0.001  |
| Chronic renal insufficiency                   | 2272 (3.0)               | 12,177 (2.5)                 | 2.6                                    | <0.001  |
| Congestive heart failure                      | 9915 (12.9)              | 57,752 (12.0)                | 2.7                                    | <0.001  |
| Diabetes                                      | 19,391 (25.3)            | 107,359 (22.4)               | 6.8                                    | <0.001  |
| Peripheral vascular disease                   | 11,425 (14.9)            | 59,301 (12.4)                | 7.4                                    | <0.001  |
| Dementia                                      | 1485 (1.9)               | 9605 (2.0)                   | 0.5                                    | 0.21    |
| Chronic pulmonary disease                     | 16,206 (21.1)            | 97,317 (20.3)                | 2.1                                    | <0.001  |
| Rheumatic disease                             | 3733 (4.9)               | 20,651 (4.3)                 | 2.7                                    | <0.001  |
| Peptic ulcer disease                          | 1799 (2.3)               | 12,107 (2.5)                 | 1.2                                    | 0.003   |
| Liver disease                                 | 1922 (2.5)               | 10,373 (2.2)                 | 2.3                                    | <0.001  |
| Paraplegia and hemiplegia                     | 673 (0.9)                | 4297 (0.9)                   | 0.2                                    | 0.60    |
| <b>Cancer</b>                                 |                          |                              |                                        |         |
| Primary malignancy                            | 10,522 (13.7)            | 60,377 (12.6)                | 3.3                                    | <0.001  |
| Metastatic disease                            | 951 (1.2)                | 5636 (1.2)                   | 0.6                                    | 0.13    |
| <b>Charlson Comorbidity Index<sup>b</sup></b> |                          |                              |                                        |         |
| 0                                             | 27,054 (35.2)            | 185,421 (38.6)               | 7.0                                    |         |
| 1                                             | 18,650 (24.3)            | 118,010 (24.6)               | 0.7                                    |         |
| 2                                             | 12,448 (16.2)            | 75,808 (15.8)                | 1.1                                    | <0.001  |
| 3                                             | 8204 (10.7)              | 47,051 (9.8)                 | 2.9                                    |         |

|                                   | Consultation<br>N=76,762 | No consultation<br>N=479,875 | Absolute Standardized Difference,<br>% | P value |
|-----------------------------------|--------------------------|------------------------------|----------------------------------------|---------|
| 4                                 | 4519 (5.9)               | 23,508 (4.9)                 | 4.4                                    |         |
| ≥5                                | 5887 (7.7)               | 30,077 (6.3)                 | 5.5                                    |         |
| <b>Revised Cardiac Risk Index</b> |                          |                              |                                        |         |
| 0 points                          | 37,480 (48.8)            | 252,184 (52.6)               | 7.5                                    |         |
| 1 point                           | 22,963 (29.9)            | 139,541 (29.1)               | 1.8                                    | <0.001  |
| 2 points                          | 10,960 (14.3)            | 60,856 (12.7)                | 4.7                                    |         |
| ≥3 points                         | 5359 (7.0)               | 27,294 (5.7)                 | 5.3                                    |         |
| <b>Surgical Facility</b>          |                          |                              |                                        |         |
| Ambulatory surgical center        | 31,944 (41.6)            | 210,673 (43.9)               | 4.6                                    |         |
| Office                            | 4645 (6.1)               | 40,172 (8.4)                 | 9.0                                    |         |
| Inpatient hospital                | 871 (1.1)                | 2814 (0.6)                   | 5.9                                    | <0.001  |
| Outpatient hospital               | 38,725 (50.4)            | 223,021 (46.5)               | 8.0                                    |         |
| Unknown                           | 577 (0.8)                | 3195 (0.7)                   | 1.0                                    |         |
| <b>Anesthesia Provider</b>        |                          |                              |                                        |         |
| Non-medically directed CRNA       | 11,890 (15.5)            | 111,869 (23.3)               | 19.9                                   |         |
| Medically directed CRNA           | 24,695 (32.2)            | 138,139 (28.8)               | 7.4                                    | <0.001  |
| Anesthesiologist                  | 33,686 (43.9)            | 162,055 (33.8)               | 20.9                                   |         |
| Unknown                           | 6491 (8.5)               | 67,812 (14.1)                | 18.0                                   |         |
| <b>Geographic Region</b>          |                          |                              |                                        |         |
| South                             | 20,051 (26.1)            | 198,566 (41.4)               | 30.9                                   |         |
| West                              | 6654 (8.7)               | 73498 (15.3)                 | 19.6                                   | <0.001  |
| Midwest                           | 19,458 (25.3)            | 127,674 (26.6)               | 0.9                                    |         |
| Northeast                         | 27,460 (35.8)            | 76,091 (15.9)                | 49.7                                   |         |
| Unknown                           | 3139 (4.1)               | 4046 (0.8)                   | 21.0                                   |         |

Abbreviation: CRNA, certified registered nurse anesthetist

<sup>a</sup>Data are expressed as count (%) unless otherwise specified.

<sup>b</sup>Charlson comorbidity index is calculated using the Quan modification of this index.

**eTable 2.** Association of consultation with patient-, provider-, facility-, and geographic-level characteristics—sensitivity analysis based on multiple imputation

|                                               | Unadjusted OR<br>(95% CI) | P value             | Adjusted OR<br>(95% CI) | P value             |
|-----------------------------------------------|---------------------------|---------------------|-------------------------|---------------------|
| <b>Demographics</b>                           |                           |                     |                         |                     |
| Age                                           |                           |                     |                         |                     |
| 66-74 years                                   | Referent                  |                     | Referent                |                     |
| 75-84                                         | 1.22 (1.18, 1.27)         | <0.001 <sup>a</sup> | 1.09 (1.04, 1.13)       | <0.001 <sup>a</sup> |
| ≥85 years                                     | 1.29 (1.22, 1.37)         |                     | 1.04 (0.98, 1.11)       |                     |
| Female sex                                    | 1.04 (1.01, 1.08)         | 0.02                | 1.02 (0.98, 1.06)       | 0.44                |
| African-American                              | 0.72 (0.66, 0.78)         | <0.001              | 0.70 (0.64, 0.77)       | <0.001              |
| <b>Charlson Comorbidity Index<sup>b</sup></b> |                           |                     |                         |                     |
| 0                                             | Referent                  |                     | Referent                |                     |
| 1                                             | 1.07 (1.02, 1.12)         |                     | 1.02 (0.97, 1.07)       |                     |
| 2                                             | 1.10 (1.04, 1.15)         |                     | 1.00 (0.94, 1.05)       |                     |
| 3                                             | 1.12 (1.05, 1.19)         | <0.001 <sup>a</sup> | 1.02 (0.95, 1.08)       | <0.001 <sup>a</sup> |
| 4                                             | 1.23 (1.14, 1.33)         |                     | 1.08 (1.00, 1.18)       |                     |
| ≥5                                            | 1.31 (1.23, 1.40)         |                     | 1.09 (1.02, 1.17)       |                     |
| <b>Rural-Urban Status</b>                     |                           |                     |                         |                     |
| Isolated rural town                           | Referent                  |                     | Referent                |                     |
| Small rural town                              | 0.79 (0.71, 0.88)         |                     | 0.94 (0.83, 1.06)       |                     |
| Large rural city                              | 1.16 (1.05, 1.27)         | <0.001 <sup>c</sup> | 1.48 (1.33, 1.65)       | <0.001 <sup>c</sup> |
| Urban                                         | 1.85 (1.71, 2.00)         |                     | 1.69 (1.53, 1.86)       |                     |
| <b>Surgical facility</b>                      |                           |                     |                         |                     |
| Ambulatory surgical center                    | Referent                  |                     | Referent                |                     |
| Office                                        | 0.70 (0.66, 0.75)         |                     | 0.84 (0.78, 0.91)       |                     |
| Inpatient hospital                            | 2.76 (1.99, 3.82)         | <0.001 <sup>c</sup> | 1.19 (0.79, 1.79)       | <0.001 <sup>c</sup> |
| Outpatient hospital                           | 1.25 (1.21, 1.30)         |                     | 1.09 (1.05, 1.14)       |                     |
| <b>Anesthesia provider</b>                    |                           |                     |                         |                     |
| Non-medically directed CRNA                   | Referent                  |                     | Referent                |                     |
| Medically directed CRNA                       | 2.06 (1.96, 2.16)         |                     | 1.24 (1.17, 1.32)       |                     |
| Anesthesiologist                              | 2.00 (1.91, 2.09)         | <0.001 <sup>c</sup> | 1.15 (1.09, 1.23)       | <0.001 <sup>c</sup> |
| <b>Geographic Region</b>                      |                           |                     |                         |                     |
| South                                         | Referent                  |                     | Referent                |                     |
| West                                          | 0.98 (0.92, 1.04)         |                     | 0.97 (0.73, 1.28)       |                     |
| Midwest                                       | 1.76 (1.68, 1.84)         | <0.001 <sup>c</sup> | 1.88 (1.44, 2.45)       | <0.001 <sup>c</sup> |
| Northeast                                     | 3.82 (3.65, 4.00)         |                     | 2.40 (1.84, 3.13)       |                     |
| <b>Revised Cardiac Risk Index<sup>d</sup></b> |                           |                     |                         |                     |
| 0 points                                      | Referent                  |                     |                         |                     |
| 1 point                                       | 1.04 (1.00, 1.09)         |                     |                         |                     |
| 2 points                                      | 1.10 (1.04, 1.15)         | <0.001 <sup>a</sup> |                         |                     |
| ≥3 points                                     | 1.20 (1.12, 1.28)         |                     |                         |                     |

Abbreviation: CRNA, certified registered nurse anesthetist

a Test of linear trend of ordered categories within variable

b Charlson comorbidity index is calculated using the Quan modification of this index.

c Group test of all categories within variable  
d Not incorporated into multivariable analysis

**eFigure.** Consultant specialty by year, as percent of all consultations in each year

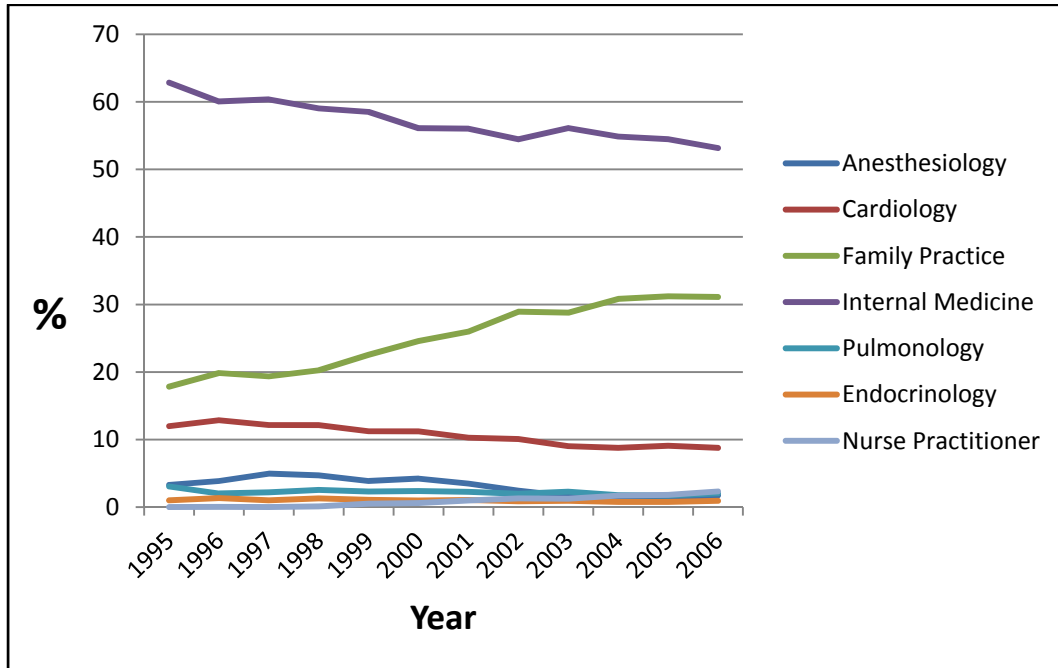

**eFigure 1.**
